# Supplementary material
Source: MDPI journal article supplement (https://www.mdpi.com/1424-2818/14/9/725)
Supplement: s1 [file s1]

Supplementary data - Phylogenetic and evolutionary reconstruction of the rainforest lineage *Fontainea* Heckel (Euphorbiaceae) based on chloroplast DNA sequences and reduced-representation SNP markers.

**Table S1.** Accession details of seven *Fontainea* taxa with indication of markers assignments and sampling locations (accession numbers in brackets represent DArTseq labels of *F. oraria*).

| Accession number                                                                                                      | Species               | cpDNA | DArT seq | Location Name                              | GPS Location*      |
|-----------------------------------------------------------------------------------------------------------------------|-----------------------|-------|----------|--------------------------------------------|--------------------|
| FA002                                                                                                                 | <i>F. australis</i>   | x     | x        | Tyalgum, NSW, Australia                    | -28.3196, 153.1582 |
| FA007, FA018, FA023,                                                                                                  | <i>F. australis</i>   | x     | x        | Crystal Creek, NSW, Australia              | -28.2735, 153.2584 |
| FA033, FA041, FA049, FA066                                                                                            | <i>F. australis</i>   | x     | x        | Curumbin Valley, QLD, Australia            | -28.2401, 153.3594 |
| FA069                                                                                                                 | <i>F. australis</i>   | x     | x        | Mooball, NSW, Australia                    | -28.4360, 153.4943 |
| FO001 (418), FO002 (420), FO003 (421), FO004 (422), FO005 (325), FO006 (401), FO007 (402), FO008 (403), , FO009 (404) | <i>F. oraria</i>      | x     | x        | Lennox Heads, NSW, Australia               | -28.8076, 153.6047 |
| FF011, FF018, FF023, FF035, FF037, FF042                                                                              | <i>F. fugax</i>       | x     | x        | Gurgeena SF, QLD, Australia                | -25.4817, 151.411  |
| FR013                                                                                                                 | <i>F. rostrata</i>    |       | x        | Goomboorian NP, QLD, Australia             | -26.1453, 152.7993 |
| FR045                                                                                                                 | <i>F. rostrata</i>    | x     |          | Ormes Rd, QLD, Australia                   | -26.1167, 152.8148 |
| FR050                                                                                                                 | <i>F. rostrata</i>    | x     |          | Laurel Rd, QLD, Australia                  | -26.1333, 152.7000 |
| FR068, FR071                                                                                                          | <i>F. rostrata</i>    | x     | x        | Gympie NP, QLD, Australia                  | -26.0908, 152.7200 |
| FR075                                                                                                                 | <i>F. rostrata</i>    | x     | x        | Ormes Rd, QLD, Australia                   | -26.1167, 152.8148 |
| FR080                                                                                                                 | <i>F. rostrata</i>    |       | x        | Ormes Rd, QLD, Australia                   | -26.1167, 152.8148 |
| FR140                                                                                                                 | <i>F. rostrata</i>    | x     |          | Rossmount, QLD, Australia                  | -26.100, 152.7333  |
| FR149                                                                                                                 | <i>F. rostrata</i>    |       | x        | Pullers, QLD Australia                     | -25.7896, 152.6869 |
| FR153                                                                                                                 | <i>F. rostrata</i>    | x     | x        | Pullers, QLD, Australia                    | -25.7896, 152.6869 |
| FR160                                                                                                                 | <i>F. rostrata</i>    | x     | x        | Tahiti Rd, QLD, Australia                  | -25.7114, 152.6567 |
| FR170                                                                                                                 | <i>F. rostrata</i>    | x     | x        | Pullers, QLD, Australia                    | -25.7896, 152.6869 |
| FPiA03                                                                                                                | <i>F. picrosperma</i> | x     |          | Evelyn Highlands, Atherton Tablelands, Qld | -17.4989, 145.4731 |
| FPiC02                                                                                                                | <i>F. picrosperma</i> | x     |          | East Barron, Atherton Tablelands, Qld      | -17.1667, 145.6167 |
| FPiD03                                                                                                                | <i>F. picrosperma</i> | x     |          | Malanda, Atherton Tablelands, Qld          | -17.3575, 145.5878 |
| FPiD023                                                                                                               | <i>F. picrosperma</i> |       | x        | Malanda, Atherton Tablelands, Qld          | -17.3575, 145.5878 |
| FPiE04                                                                                                                | <i>F. picrosperma</i> | x     |          | Topaz, Atherton Tablelands, Qld            | -17.4697, 145.7226 |
| FPiF10                                                                                                                | <i>F. picrosperma</i> | x     |          | Gadgarra, Atherton Tablelands, Qld         | -17.2833, 145.7000 |
| FPiG124                                                                                                               | <i>F. picrosperma</i> | x     |          | Boonjie, Atherton Tablelands, Qld          | -17.3333, 145.6667 |

|                                                |                       |   |   |                                            |                    |
|------------------------------------------------|-----------------------|---|---|--------------------------------------------|--------------------|
| FPIJ010                                        | <i>F. picrosperma</i> |   | x | Evelyn Highlands, Atherton Tablelands, Qld | -17.4989, 145.4731 |
| FPIJ091                                        | <i>F. picrosperma</i> | x | x | Evelyn Highlands, Atherton Tablelands, Qld | -17.4989, 145.4731 |
| FPIJ096                                        | <i>F. picrosperma</i> |   | x | Evelyn Highlands, Atherton Tablelands, Qld | -17.4989, 145.4731 |
| FPIJ401                                        | <i>F. picrosperma</i> |   | x | Evelyn Highlands, Atherton Tablelands, Qld | -17.4989, 145.4731 |
| FPILO24                                        | <i>F. picrosperma</i> | x | x | Evelyn Highlands, Atherton Tablelands, Qld | -17.4989, 145.4731 |
| FPIPO79                                        | <i>F. picrosperma</i> | x |   | Evelyn Highlands, Atherton Tablelands, Qld | -17.4989, 145.4731 |
| FPIE025                                        | <i>F. picrosperma</i> |   | x | Topaz, Atherton Tablelands, Qld            | -17.4697, 145.7226 |
| FPIB014                                        | <i>F. picrosperma</i> |   | x | Boonjie, Atherton Tablelands, Qld          | -17.3333, 145.6667 |
| FPIA314                                        | <i>F. picrosperma</i> |   | x | Evelyn Highlands, Atherton Tablelands, Qld | -17.4989, 145.4731 |
| FV015, FV017, FV019, FV037, FV039              | <i>F. venosa</i>      | x | x | Marys Creek SF, QLD, Australia             | -26.2498, 152.5583 |
| FV043, FV045,                                  | <i>F. venosa</i>      | x | x | Brooyar SF, QLD, Australia                 | -26.1567, 152.5094 |
| FV086, FV094, FV126                            | <i>F. venosa</i>      | x | x | Boyne Valley, QLD, Australia               | -24.4320, 151.2175 |
| FPa004, FPa006, FPa008, FPa010, FPa013, FPa014 | <i>F. pancheri</i>    | x | x | Grand Terre, New Caledonia                 | -21.3333, 164.9667 |

\* Accuracy of some GPS data points has been intentionally inflated for privacy of landholders and sensitive nature of rare, threatened populations.

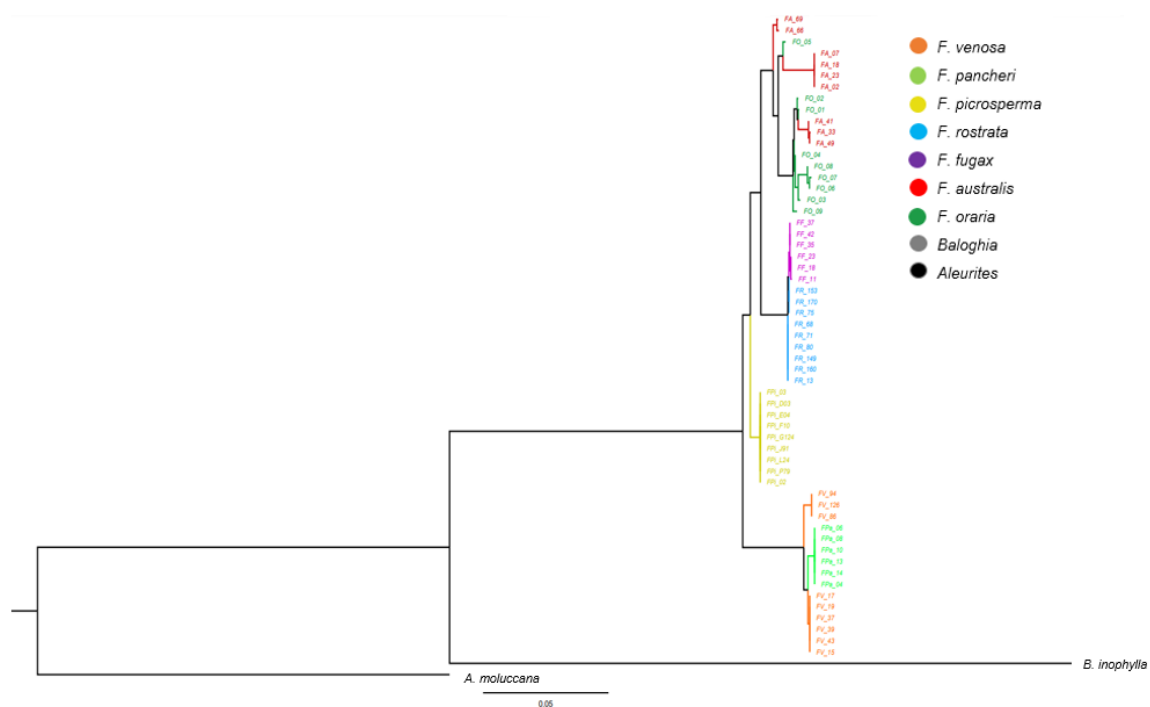

**Figure S1.** Maximum-Likelihood phylogenetic tree of the Austral-Pacific *Fontainea* complex constructed from individually aligned and concatenated cpDNA sequence markers based on the best-fit GTR + G + I model.

*Baloghia inophylla* and *Aleurites moluccana* were used as outgroup representatives to root the tree. The scale bar represents substitutions per site and tip labels are coloured by species; see inset legend.

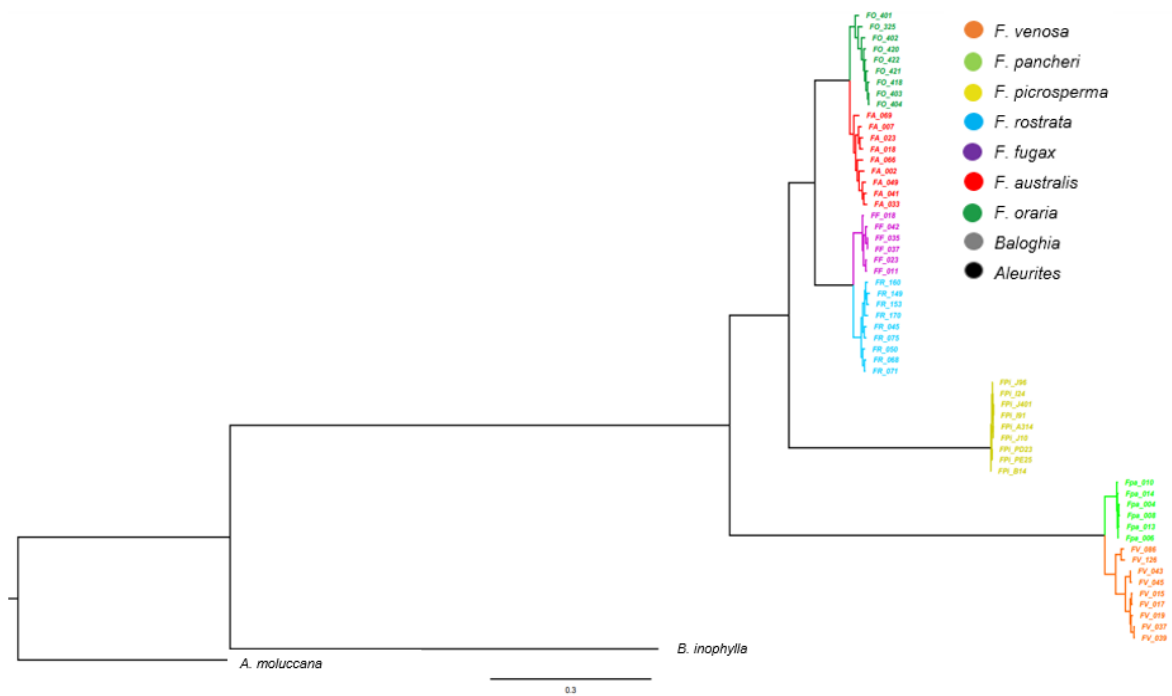

**Figure S2.** Maximum-Likelihood phylogenetic tree of the Austral-Pacific *Fontainea* complex constructed from the individually aligned and concatenated sequences of reduced-representation SNP markers (5,608 loci) based on the best-fit GTR model. *Baloghia inophylla* and *Aleurites moluccana* were used as outgroup representatives to root the tree. The scale bar represents substitutions per site and tip labels are coloured by species; see inset legend.

**Table S2.** Values for nucleotide substitution models used to select best-fit model of *Fontainea* phylogenetic tree construction from concatenation of three cpDNA markers.

| Model   | df  | logLik  | AIC      | AICw     | AICc     | AICcw    | BIC      |
|---------|-----|---------|----------|----------|----------|----------|----------|
| JC      | 115 | -117947 | 236125   | 0        | 236126.6 | 0        | 237012.4 |
| JC+I    | 115 | -117947 | 236124.8 | 0        | 236126.4 | 0        | 237012.2 |
| JC+G    | 116 | -117952 | 236136.9 | 0        | 236138.6 | 0        | 237032.1 |
| JC+G+I  | 116 | -117952 | 236136.9 | 0        | 236138.6 | 0        | 237032.1 |
| F81     | 118 | -117844 | 235923.2 | 0        | 235924.9 | 0        | 236833.8 |
| F81+I   | 118 | -117844 | 235923.1 | 0        | 235924.8 | 0        | 236833.6 |
| F81+G   | 119 | -117849 | 235935.5 | 0        | 235937.2 | 0        | 236853.8 |
| F81+G+I | 119 | -117849 | 235935.5 | 0        | 235937.2 | 0        | 236853.8 |
| K80     | 116 | -115704 | 231639.6 | 5.73E-70 | 231641.3 | 6.35E-70 | 232534.8 |
| K80+I   | 116 | -115704 | 231639.6 | 5.86E-70 | 231641.2 | 6.49E-70 | 232534.7 |
| K80+G   | 117 | -115709 | 231651   | 1.90E-72 | 231652.7 | 2.07E-72 | 232553.9 |
| K80+G+I | 117 | -115709 | 231651   | 1.90E-72 | 231652.7 | 2.07E-72 | 232553.9 |
| HKY     | 119 | -115597 | 231431.5 | 9.03E-25 | 231433.2 | 9.59E-25 | 232349.8 |

|         |     |         |          |          |          |          |          |
|---------|-----|---------|----------|----------|----------|----------|----------|
| HKY+I   | 119 | -115597 | 231431.4 | 9.26E-25 | 231433.1 | 9.82E-25 | 232349.7 |
| HKY+G   | 120 | -115601 | 231442.9 | 3.02E-27 | 231444.6 | 3.16E-27 | 232368.9 |
| HKY+G+I | 120 | -115601 | 231442.9 | 3.02E-27 | 231444.6 | 3.16E-27 | 232368.9 |
| SYM     | 120 | -115607 | 231453.2 | 1.72E-29 | 231455   | 1.80E-29 | 232379.2 |
| SYM+I   | 120 | -115607 | 231453.2 | 1.75E-29 | 231454.9 | 1.83E-29 | 232379.2 |
| SYM+G   | 121 | -115611 | 231464.7 | 5.49E-32 | 231466.5 | 5.66E-32 | 232398.4 |
| SYM+G+I | 121 | -115611 | 231464.7 | 5.49E-32 | 231466.5 | 5.66E-32 | 232398.4 |
| GTR     | 123 | -115538 | 231322.2 | 0.49246  | 231324   | 0.492483 | 232271.3 |
| GTR+I   | 123 | -115538 | 231322.1 | 0.504487 | 231324   | 0.504511 | 232271.3 |
| GTR+G   | 124 | -115543 | 231333.7 | 0.001526 | 231335.6 | 0.001503 | 232290.6 |
| GTR+G+I | 124 | -115543 | 231333.7 | 0.001526 | 231335.6 | 0.001503 | 232290.6 |

**Table S3.** Values for nucleotide substitution models used to select best-fit model of Fontainea phylogenetic tree construction from concatenation of DArTseq SNPs (33170 nucleotides).

| Model       | df  | logLik  | AIC      | AICw     | AICc     | AICcw    | BIC      |
|-------------|-----|---------|----------|----------|----------|----------|----------|
| JC          | 115 | -111114 | 222457.4 | 0        | 222459   | 0        | 223344.7 |
| JC+I        | 115 | -111114 | 222457.4 | 0        | 222459   | 0        | 223344.7 |
| JC+G(4)     | 116 | -111116 | 222464.6 | 0        | 222466.3 | 0        | 223359.7 |
| JC+G(4)+I   | 116 | -111116 | 222464.6 | 0        | 222466.3 | 0        | 223359.7 |
| F81         | 118 | -111081 | 222398.4 | 0        | 222400.1 | 0        | 223308.9 |
| F81+I       | 118 | -111081 | 222398.4 | 0        | 222400.1 | 0        | 223308.9 |
| F81+G(4)    | 119 | -111084 | 222405.6 | 0        | 222407.4 | 0        | 223323.9 |
| F81+G(4)+I  | 119 | -111084 | 222405.6 | 0        | 222407.4 | 0        | 223323.9 |
| K80         | 116 | -108869 | 217970.9 | 7.15E-47 | 217972.5 | 7.88E-47 | 218866   |
| K80+I       | 116 | -108869 | 217970.9 | 7.16E-47 | 217972.5 | 7.89E-47 | 218866   |
| K80+G(4)    | 117 | -108872 | 217977.7 | 2.35E-48 | 217979.4 | 2.55E-48 | 218880.5 |
| K80+G(4)+I  | 117 | -108872 | 217977.7 | 2.35E-48 | 217979.4 | 2.55E-48 | 218880.5 |
| HKY         | 119 | -108838 | 217913.8 | 1.77E-34 | 217915.5 | 1.87E-34 | 218832   |
| HKY+I       | 119 | -108838 | 217913.8 | 1.78E-34 | 217915.5 | 1.87E-34 | 218832   |
| HKY+G(4)    | 120 | -108840 | 217920.6 | 5.82E-36 | 217922.4 | 6.05E-36 | 218846.6 |
| HKY+G(4)+I  | 120 | -108840 | 217920.6 | 5.82E-36 | 217922.4 | 6.05E-36 | 218846.6 |
| TrNe        | 117 | -108868 | 217969.6 | 1.34E-46 | 217971.3 | 1.46E-46 | 218872.4 |
| TrNe+I      | 117 | -108868 | 217969.6 | 1.35E-46 | 217971.3 | 1.46E-46 | 218872.4 |
| TrNe+G(4)   | 118 | -108870 | 217976.5 | 4.40E-48 | 217978.2 | 4.71E-48 | 218887   |
| TrNe+G(4)+I | 118 | -108870 | 217976.5 | 4.40E-48 | 217978.2 | 4.71E-48 | 218887   |
| TrN         | 120 | -108837 | 217913.2 | 2.39E-34 | 217915   | 2.49E-34 | 218839.2 |
| TrN+I       | 120 | -108837 | 217913.2 | 2.39E-34 | 217915   | 2.49E-34 | 218839.2 |
| TrN+G(4)    | 121 | -108839 | 217920   | 7.83E-36 | 217921.8 | 8.02E-36 | 218853.7 |
| TrN+G(4)+I  | 121 | -108839 | 217920   | 7.84E-36 | 217921.8 | 8.03E-36 | 218853.7 |
| TPM1        | 117 | -108868 | 217970.9 | 6.92E-47 | 217972.6 | 7.52E-47 | 218873.8 |
| TPM1+I      | 117 | -108868 | 217970.9 | 6.93E-47 | 217972.6 | 7.52E-47 | 218873.8 |
| TPM1+G(4)   | 118 | -108871 | 217977.8 | 2.27E-48 | 217979.5 | 2.43E-48 | 218888.3 |
| TPM1+G(4)+I | 118 | -108871 | 217977.8 | 2.27E-48 | 217979.5 | 2.43E-48 | 218888.3 |
| K81         | 117 | -108868 | 217970.9 | 6.92E-47 | 217972.6 | 7.52E-47 | 218873.8 |
| K81+I       | 117 | -108868 | 217970.9 | 6.93E-47 | 217972.6 | 7.52E-47 | 218873.8 |

|              |     |         |          |          |          |          |          |
|--------------|-----|---------|----------|----------|----------|----------|----------|
| K81+G(4)     | 118 | -108871 | 217977.8 | 2.27E-48 | 217979.5 | 2.43E-48 | 218888.3 |
| K81+G(4)+I   | 118 | -108871 | 217977.8 | 2.27E-48 | 217979.5 | 2.43E-48 | 218888.3 |
| TPM1u        | 120 | -108837 | 217914.2 | 1.45E-34 | 217916   | 1.51E-34 | 218840.2 |
| TPM1u+I      | 120 | -108837 | 217914.2 | 1.45E-34 | 217916   | 1.51E-34 | 218840.2 |
| TPM1u+G(4)   | 121 | -108840 | 217921   | 4.76E-36 | 217922.8 | 4.88E-36 | 218854.7 |
| TPM1u+G(4)+I | 121 | -108840 | 217921   | 4.76E-36 | 217922.8 | 4.88E-36 | 218854.7 |
| TPM2         | 117 | -108815 | 217863.4 | 1.54E-23 | 217865.1 | 1.68E-23 | 218766.2 |
| TPM2+I       | 117 | -108815 | 217863.4 | 1.55E-23 | 217865.1 | 1.68E-23 | 218766.2 |
| TPM2+G(4)    | 118 | -108817 | 217870.2 | 5.13E-25 | 217871.9 | 5.49E-25 | 218780.8 |
| TPM2+G(4)+I  | 118 | -108817 | 217870.2 | 5.13E-25 | 217871.9 | 5.49E-25 | 218780.8 |
| TPM2u        | 120 | -108797 | 217833.4 | 5.20E-17 | 217835.1 | 5.41E-17 | 218759.3 |
| TPM2u+I      | 120 | -108797 | 217833.4 | 5.20E-17 | 217835.1 | 5.41E-17 | 218759.3 |
| TPM2u+G(4)   | 121 | -108799 | 217840.2 | 1.71E-18 | 217842   | 1.75E-18 | 218773.9 |
| TPM2u+G(4)+I | 121 | -108799 | 217840.2 | 1.71E-18 | 217842   | 1.75E-18 | 218773.9 |
| TPM3         | 117 | -108828 | 217890.1 | 2.42E-29 | 217891.8 | 2.63E-29 | 218793   |
| TPM3+I       | 117 | -108828 | 217890.1 | 2.43E-29 | 217891.8 | 2.63E-29 | 218793   |
| TPM3+G(4)    | 118 | -108830 | 217897   | 7.97E-31 | 217898.7 | 8.53E-31 | 218807.5 |
| TPM3+G(4)+I  | 118 | -108830 | 217897   | 7.97E-31 | 217898.7 | 8.53E-31 | 218807.5 |
| TPM3u        | 120 | -108803 | 217846   | 9.50E-20 | 217847.7 | 9.87E-20 | 218771.9 |
| TPM3u+I      | 120 | -108803 | 217846   | 9.50E-20 | 217847.7 | 9.88E-20 | 218771.9 |
| TPM3u+G(4)   | 121 | -108805 | 217852.8 | 3.11E-21 | 217854.6 | 3.19E-21 | 218786.5 |
| TPM3u+G(4)+I | 121 | -108805 | 217852.8 | 3.11E-21 | 217854.6 | 3.19E-21 | 218786.5 |
| TIM1e        | 118 | -108867 | 217969.7 | 1.30E-46 | 217971.4 | 1.39E-46 | 218880.2 |
| TIM1e+I      | 118 | -108867 | 217969.7 | 1.30E-46 | 217971.4 | 1.39E-46 | 218880.2 |
| TIM1e+G(4)   | 119 | -108869 | 217976.5 | 4.26E-48 | 217978.3 | 4.49E-48 | 218894.8 |
| TIM1e+G(4)+I | 119 | -108869 | 217976.5 | 4.26E-48 | 217978.3 | 4.49E-48 | 218894.8 |
| TIM1         | 121 | -108836 | 217913.6 | 1.96E-34 | 217915.4 | 2.01E-34 | 218847.3 |
| TIM1+I       | 121 | -108836 | 217913.6 | 1.96E-34 | 217915.4 | 2.01E-34 | 218847.3 |
| TIM1+G(4)    | 122 | -108838 | 217920.4 | 6.42E-36 | 217922.3 | 6.48E-36 | 218861.8 |
| TIM1+G(4)+I  | 122 | -108838 | 217920.4 | 6.42E-36 | 217922.3 | 6.48E-36 | 218861.8 |
| TIM2e        | 118 | -108813 | 217862.2 | 2.83E-23 | 217863.9 | 3.03E-23 | 218772.7 |
| TIM2e+I      | 118 | -108813 | 217862.2 | 2.83E-23 | 217863.9 | 3.03E-23 | 218772.7 |
| TIM2e+G(4)   | 119 | -108816 | 217869   | 9.38E-25 | 217870.8 | 9.90E-25 | 218787.3 |
| TIM2e+G(4)+I | 119 | -108816 | 217869   | 9.38E-25 | 217870.8 | 9.90E-25 | 218787.3 |
| TIM2         | 121 | -108795 | 217833   | 6.36E-17 | 217834.8 | 6.51E-17 | 218766.6 |
| TIM2+I       | 121 | -108795 | 217833   | 6.36E-17 | 217834.7 | 6.51E-17 | 218766.6 |
| TIM2+G(4)    | 122 | -108798 | 217839.8 | 2.09E-18 | 217841.6 | 2.11E-18 | 218781.2 |
| TIM2+G(4)+I  | 122 | -108798 | 217839.8 | 2.09E-18 | 217841.6 | 2.11E-18 | 218781.2 |
| TIM3e        | 118 | -108826 | 217888.8 | 4.65E-29 | 217890.6 | 4.97E-29 | 218799.4 |
| TIM3e+I      | 118 | -108826 | 217888.8 | 4.65E-29 | 217890.5 | 4.98E-29 | 218799.4 |
| TIM3e+G(4)   | 119 | -108829 | 217895.7 | 1.53E-30 | 217897.4 | 1.61E-30 | 218813.9 |
| TIM3e+G(4)+I | 119 | -108829 | 217895.7 | 1.53E-30 | 217897.4 | 1.61E-30 | 218813.9 |
| TIM3         | 121 | -108802 | 217845.1 | 1.44E-19 | 217846.9 | 1.48E-19 | 218778.8 |
| TIM3+I       | 121 | -108802 | 217845.1 | 1.44E-19 | 217846.9 | 1.48E-19 | 218778.8 |
| TIM3+G(4)    | 122 | -108804 | 217852   | 4.73E-21 | 217853.8 | 4.77E-21 | 218793.4 |
| TIM3+G(4)+I  | 122 | -108804 | 217852   | 4.73E-21 | 217853.8 | 4.77E-21 | 218793.4 |

|             |     |         |          |          |          |          |          |
|-------------|-----|---------|----------|----------|----------|----------|----------|
| TVMe        | 119 | -108770 | 217778.6 | 3.94E-05 | 217780.4 | 4.16E-05 | 218696.9 |
| TVMe+I      | 119 | -108770 | 217778.6 | 3.95E-05 | 217780.4 | 4.16E-05 | 218696.9 |
| TVMe+G(4)   | 120 | -108773 | 217785.5 | 1.31E-06 | 217787.2 | 1.36E-06 | 218711.4 |
| TVMe+G(4)+I | 120 | -108773 | 217785.5 | 1.31E-06 | 217787.2 | 1.36E-06 | 218711.4 |
| TVM         | 122 | -108759 | 217761.5 | 0.20394  | 217763.4 | 0.205808 | 218702.9 |
| TVM+I       | 122 | -108759 | 217761.5 | 0.203995 | 217763.4 | 0.205863 | 218702.9 |
| TVM+G(4)    | 123 | -108761 | 217768.4 | 0.006714 | 217770.2 | 0.006675 | 218717.5 |
| TVM+G(4)+I  | 123 | -108761 | 217768.4 | 0.006714 | 217770.2 | 0.006675 | 218717.5 |
| SYM         | 120 | -108769 | 217777.4 | 7.39E-05 | 217779.2 | 7.68E-05 | 218703.4 |
| SYM+I       | 120 | -108769 | 217777.4 | 7.39E-05 | 217779.2 | 7.68E-05 | 218703.4 |
| SYM+G(4)    | 121 | -108771 | 217784.2 | 2.46E-06 | 217786   | 2.52E-06 | 218717.9 |
| SYM+G(4)+I  | 121 | -108771 | 217784.2 | 2.46E-06 | 217786   | 2.52E-06 | 218717.9 |
| GTR         | 123 | -108757 | 217760.9 | 0.279944 | 217762.8 | 0.278302 | 218710   |
| GTR+I       | 123 | -108757 | 217760.9 | 0.280013 | 217762.8 | 0.27837  | 218710   |
| GTR+G(4)    | 124 | -108760 | 217767.7 | 0.009223 | 217769.6 | 0.009031 | 218724.6 |
| GTR+G(4)+I  | 124 | -108760 | 217767.7 | 0.009223 | 217769.6 | 0.009031 | 218724.6 |
